# Supplementary material for: Human thioredoxin, a damage-associated molecular pattern and Malassezia-crossreactive autoallergen, modulates immune responses via the C-type lectin receptors Dectin-1 and Dectin-2
Source: PubMed Central journal article supplement (PMC6671947; doi:10.1038/s41598-019-47769-2), 2019-08-01
Supplement: 41598_2019_47769_MOESM1_ESM.pdf [file 41598_2019_47769_MOESM1_ESM.pdf]

Human thioredoxin, a damage-associated molecular pattern and *Malassezia*-crossreactive autoallergen, modulates immune responses via the C-type lectin receptors Dectin-1 and Dectin-2

Roesner, L.M.,<sup>1\*</sup> Ernst, M.,<sup>1§</sup> Chen, W.,<sup>1</sup> Begemann, G.,<sup>1</sup> Kienlin, P.,<sup>1</sup> Raulf, M.K.,<sup>2,3</sup> Lepenies, B.,<sup>2</sup> and Werfel, T.<sup>1</sup>

### Supplementary Information

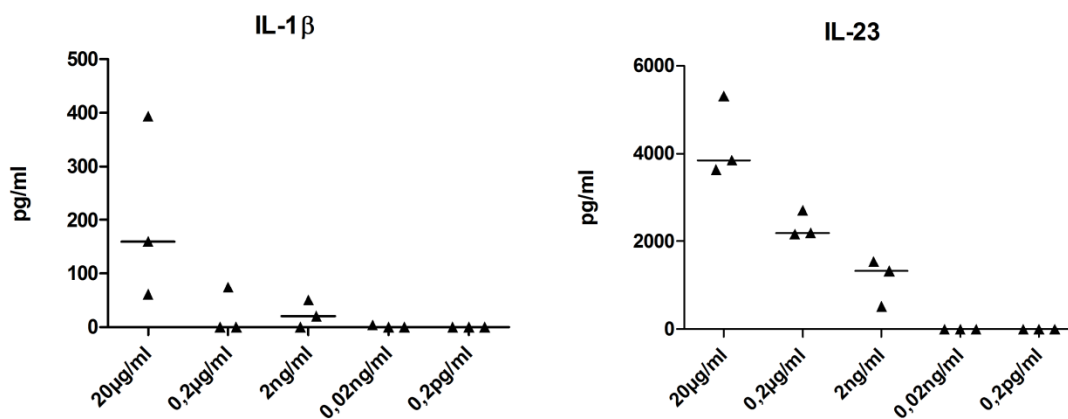

**Figure S1. Cytokine release from moDC after application of LPS.** In the experimental setup applied in this work, LPS contaminations of 2ng/ml or higher would have had the potential to lead to false positive effects.

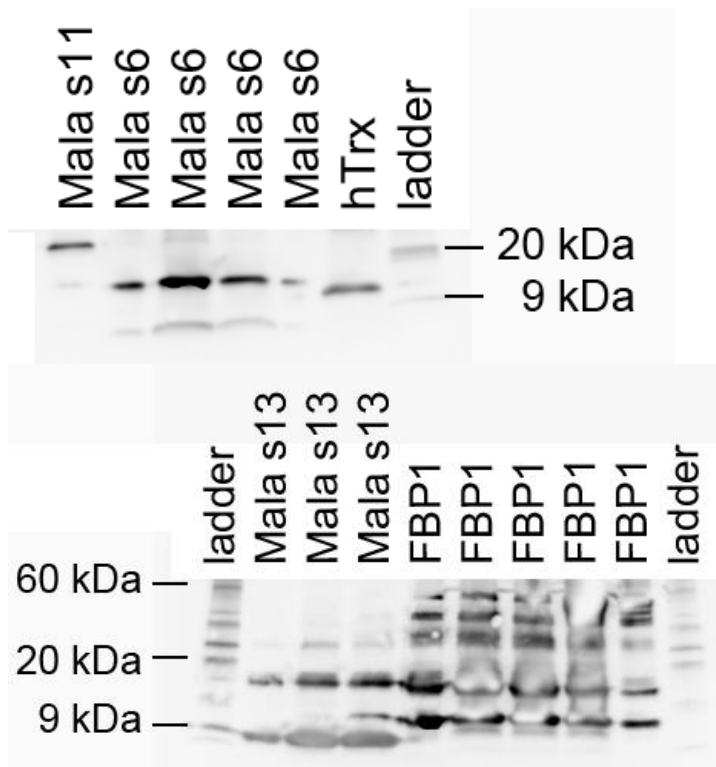

**Figure S2. Detection of recombinant proteins applied to the Dectin-1 binding platform.** Recombinantly expressed, 6xHis-tagged allergens of *Malassezia*, Mala s6, s11, and s13, as well as its human paralogue thioredoxin (hTrx) and the fibronectin binding protein 1 (FBP1) from *Staphylococcus aureus* were detected via an antibody specific to 6xHis-tag.
